# Supplementary material for: Multidirectional Effects of Red Clover (Trifolium pratense L.) in Support of Menopause Therapy
Source: MDPI journal article supplement (doi:10.3390/molecules28135178), 2023-07-03
Supplement: s1 [file s1]

## Supplementary Materials

**Table S1.** Validation parameters for standard.

| Parametr                                              | Genistein                           | Daidzein                            | Formononetin                        | Biochanin A                         |
|-------------------------------------------------------|-------------------------------------|-------------------------------------|-------------------------------------|-------------------------------------|
| Linearity: $y = ax + b$                               |                                     |                                     |                                     |                                     |
| $a \pm S_a$                                           | $698.76 \pm 2.41$                   | $439.08 \pm 7.71$                   | $486.29 \pm 9.92$                   | $650.13 \pm 31.82$                  |
| $b \pm S_b$                                           | nonsignificant<br>( $\alpha=0,05$ ) | nonsignificant<br>( $\alpha=0,05$ ) | nonsignificant<br>( $\alpha=0,05$ ) | nonsignificant<br>( $\alpha=0,05$ ) |
| Correlation coefficient (r)                           | 0,9999                              | 0.99982                             | 0.9975                              | 0.9985                              |
| Linearity [mg/ml]                                     | 0.011 – 0.719                       | 0.001-0.727                         | 0.010-0.640                         | 0.010-0.682                         |
| RSD (%)                                               |                                     |                                     |                                     |                                     |
| Low content                                           | 0.2138                              | 0.4468                              | 4.3483                              | 1,3263                              |
| Medium content                                        | 0.7391                              | 0.4791                              | 2.8847                              | 0,5313                              |
| High content                                          | 0.6603                              | 0.1145                              | 2.2072                              | 0,5865                              |
| Limit of detection (LOD)<br>[ $\mu\text{g/ml}$ ]      | 0.0025                              | 0.0164                              | 0.0133                              | 0.0341                              |
| Limit of quantification (LOQ)<br>[ $\mu\text{g/ml}$ ] | 0.0077                              | 0.0496                              | 0.0403                              | 0.1034                              |

$S_a$  - standard deviation of the slope;  $S_b$  - standard deviation of the intersection point. t. calculated values of the Student's t-test.  $t_{\alpha, f} = 3.182$  Critical values of the Student's test for degrees of freedom  $f = 3$  and significance level  $\alpha = 0.05$ .

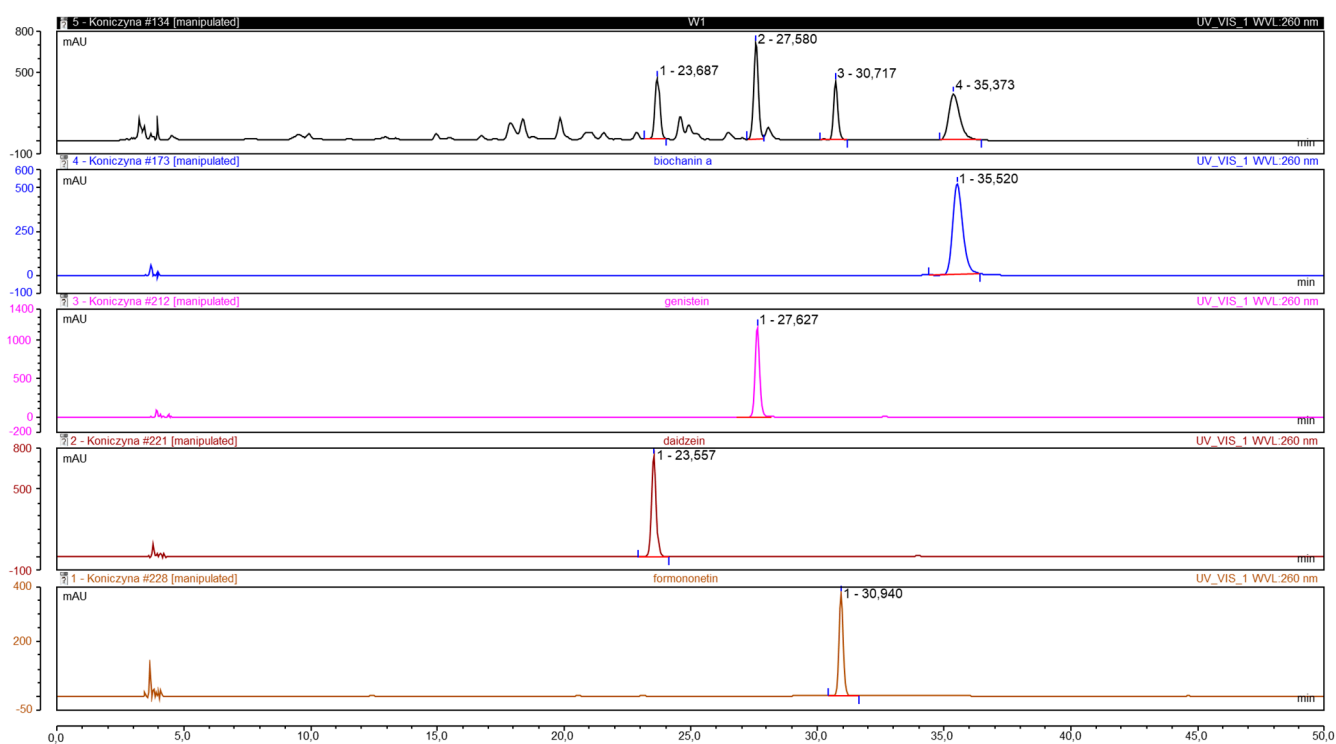

**Figure S1.** Chromatograms with retention times of the test compounds (genistein, daidzein, biochanin, formononetin) and of the sample extract.
